# Supplementary material for: Harnessing Environmental DNA Metabarcoding for the Detection and Mapping of Vulnerable Marine Ecosystems in the Mediterranean Sea
Source: Research Square preprint supplement (doi:10.21203/rs.3.rs-6907089/v1), 2025-08-22
Supplement: Supplementary file 1 [file 4e3f5b7b00a86f8c7616836f.docx]

| **Bioinformatic step** | **Total objects** |
| --- | --- |
| Paired-end merged reads demultiplexing | 5211868 reads |
| Filtering based on alignment quality (score > 40) | 5203742 reads; 1384808 sequences |
| Length filtering (290-340 bp) and ambiguous bases removal | 5002901 reads; 1268438 sequences |
| Chimera removal | 4870200 reads; 1165110 sequences |
| MOTU clustering | 24141 MOTUs |
| Singleton removal | 4851074 reads; 1145984 sequences; 5015 MOTUs |
